# Supplementary material
Source: MDPI journal article supplement (https://www.mdpi.com/2072-4292/12/1/187)
Supplement: s1 [file s1]

## Supplementary Materials

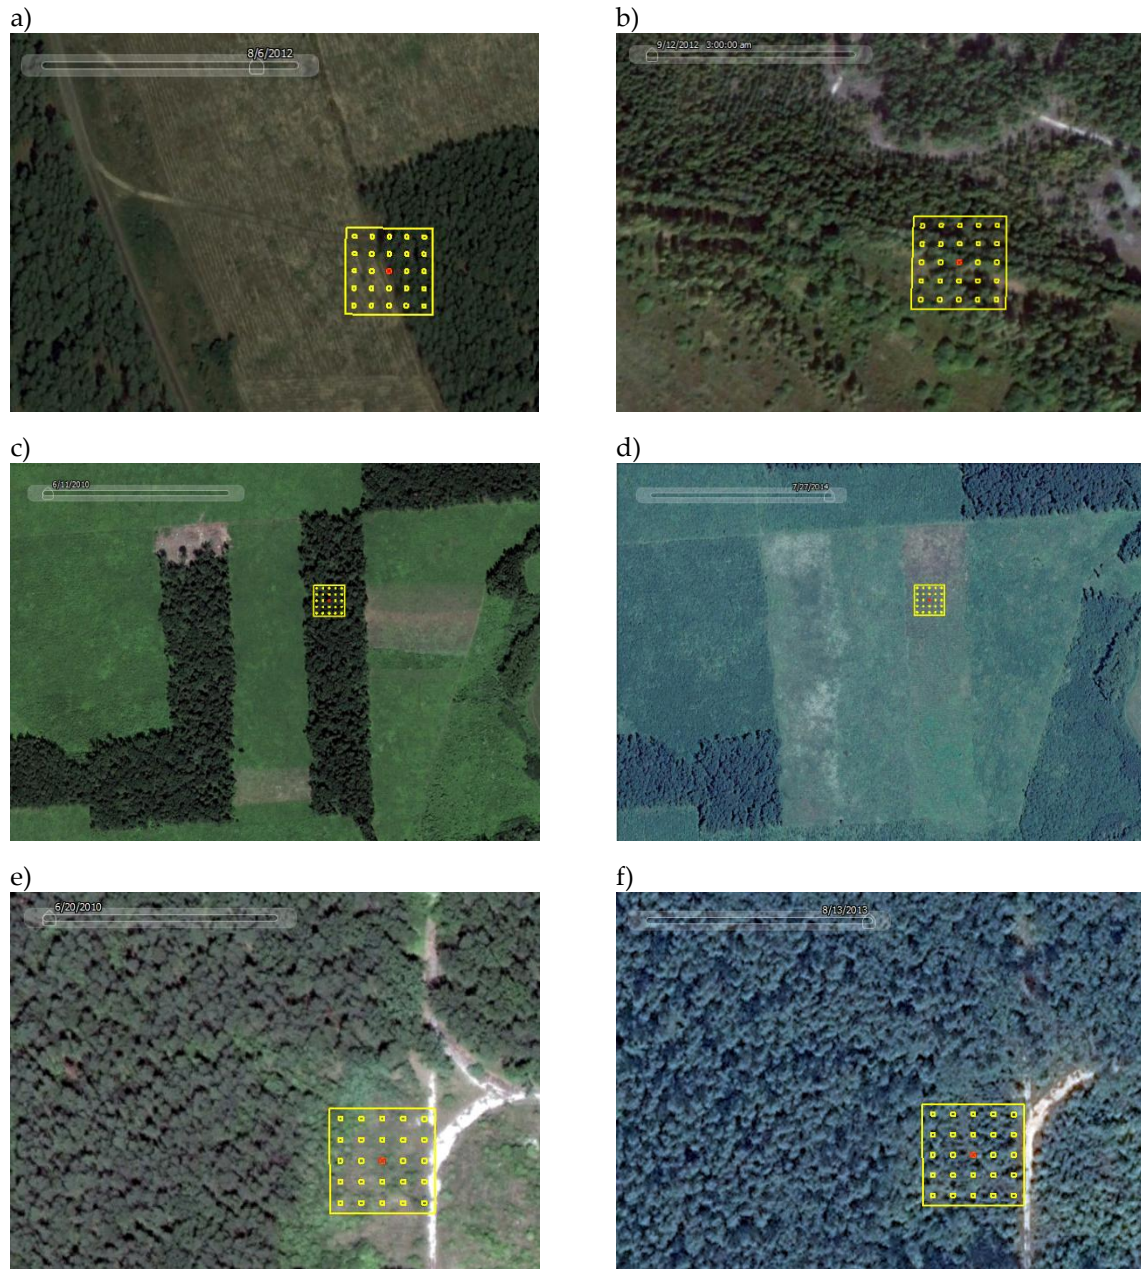

**Figure S1.** Examples of collection of reference data using Google image analysis in time: a) the plot is interpreted as unforested (Lon = 33.370047; Lat = 51.672211); b) the plot is classified as forested (Lon = 29.324394; Lat = 51.324563); c) for the period of 2010 the plot is forested but d) in 2015 is classified as unforested (Lon = 29.060559; Lat = 49.968467); e) in 2004 the plot is unforested whereas f) in 2015 is interpreted as forested (Lon = 34.403828; Lat = 50.597736)

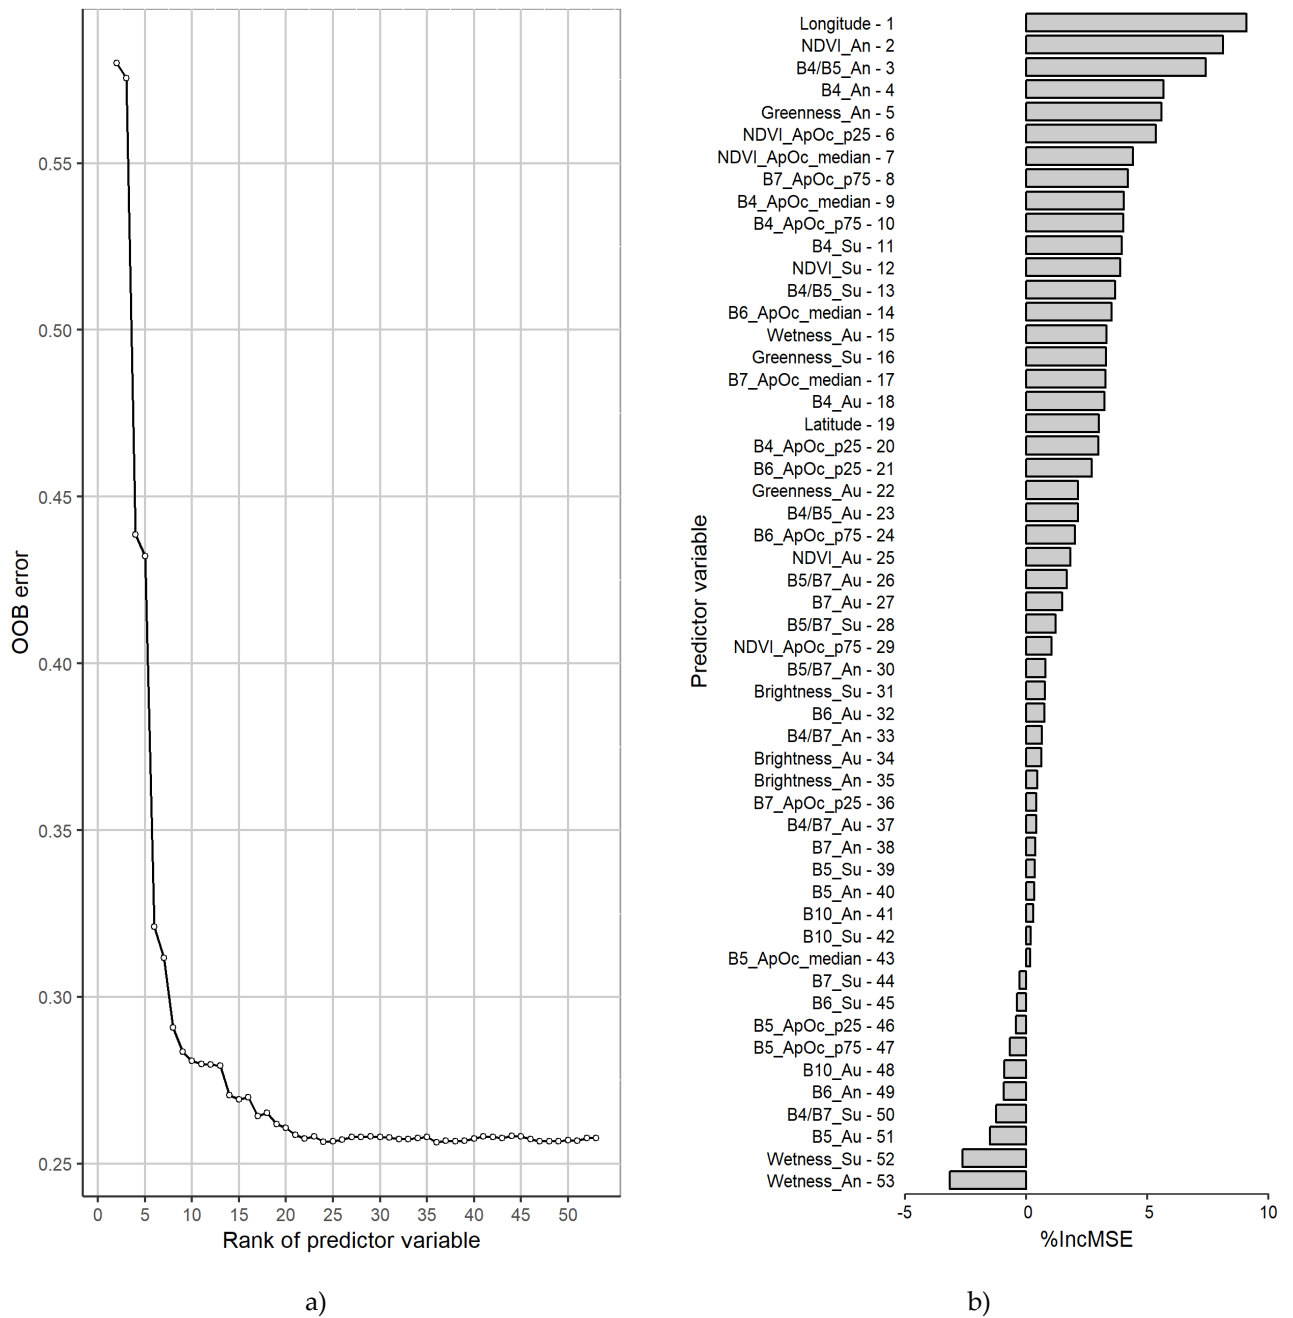

**Figure S2.** Impact of predictor variables onto the classification accuracy (panel a) shows the relationship between the number of variables and out-of-bag classification error, panel b) shows the ranked predictors' impact onto the decrease of MSE of a model)



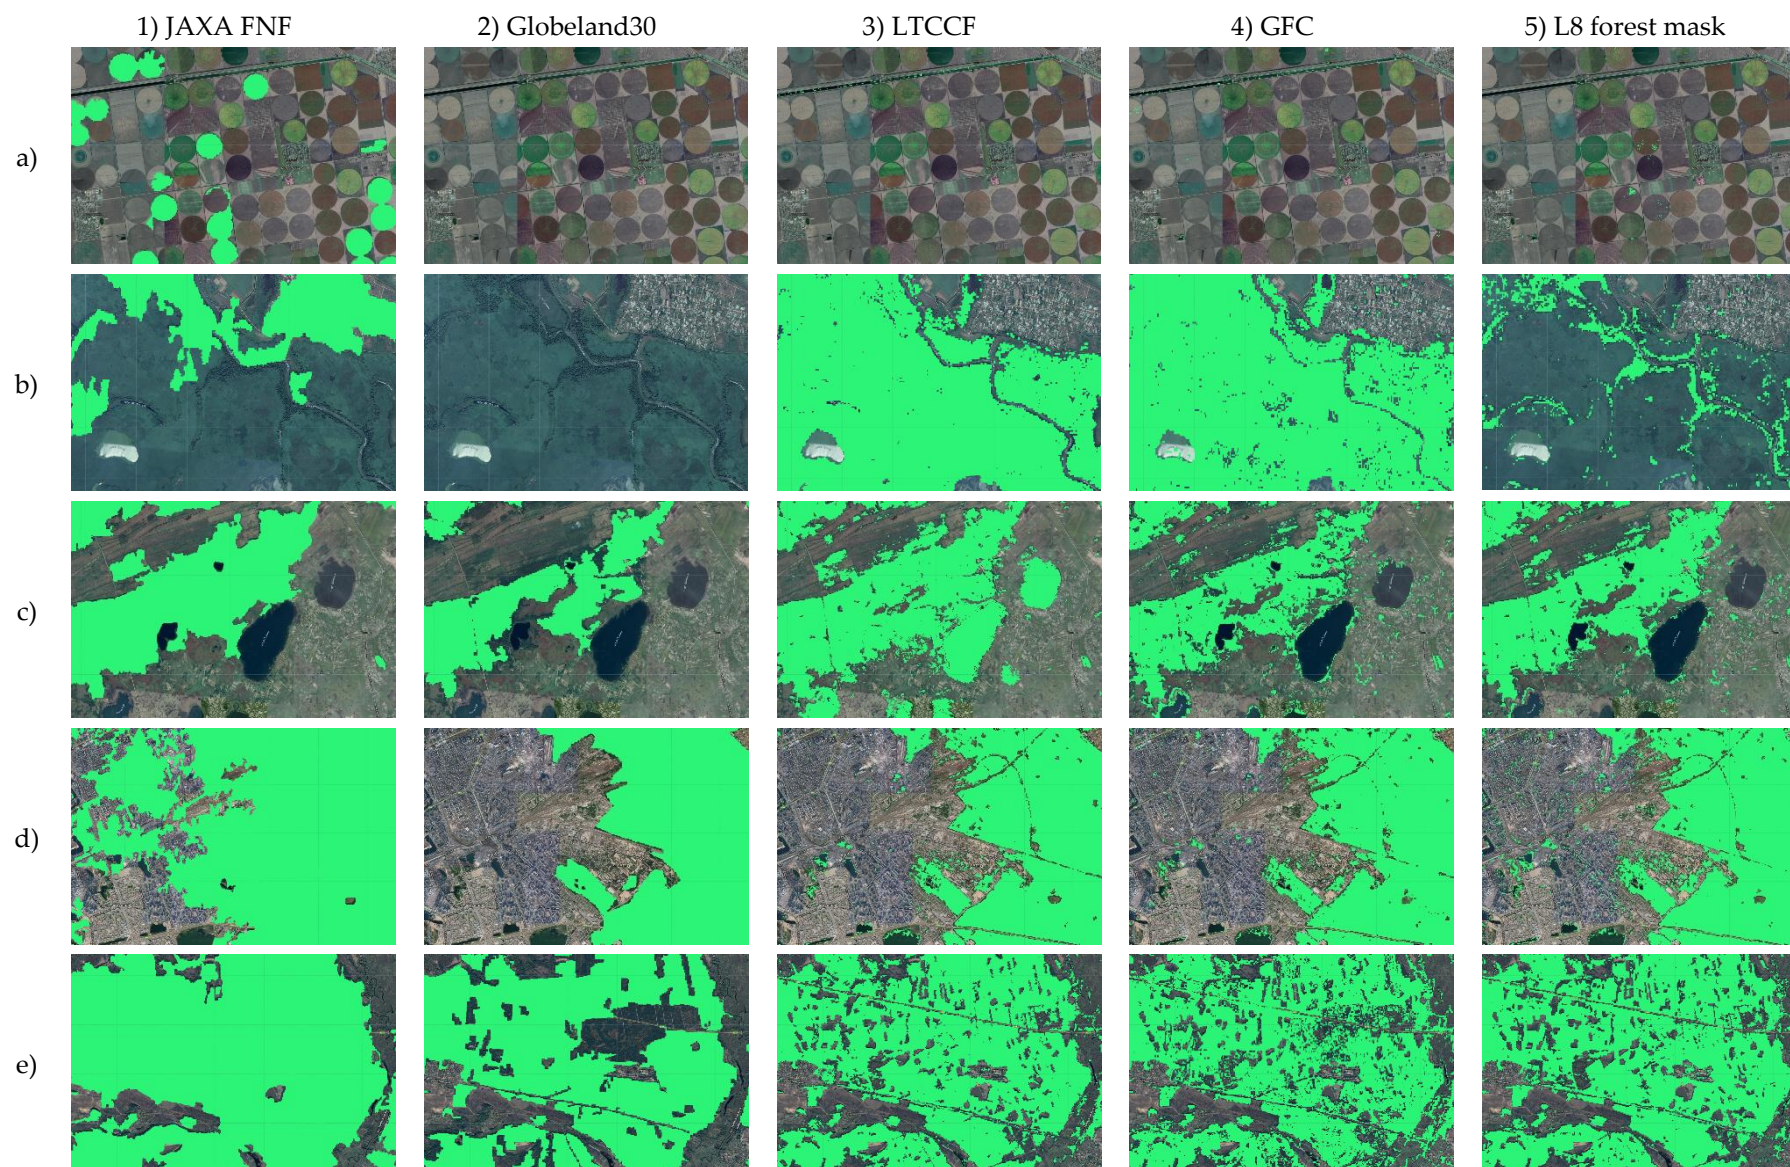

**Figure S3.** Examples of forest masks performance over different landscapes of flatland of Ukraine: a) irrigated croplands (Kherson oblast, Lon = 33.8736, Lat = 46.5905); b) wetlands (Odessa oblast, Lon = 30.0580, Lat = 46.4889); c) water bodies (Volyn (Lutsk) oblast, Lon = 24.1981, Lat = 51.4958); d) settlements (Kyiv oblast, Lon = 30.6755, Lat = 50.4186); e) clearcuts, meadows, unstocked forest crops (Zhytomyr oblast, Lon = 29.5300, Lat = 50.7236)

**Table S1.** The error matrix of Landsat-derived land cover classification over flat land Ukraine expressed in terms of the proportion of area as suggested in Olofsson et al. (2014)

| Map class                | Reference class |              |              |                          |              |              |              |                          | Total number of units | Map class area, thousands ha | The proportion of map class (weight) | Adjusted proportion of area of map class |
|--------------------------|-----------------|--------------|--------------|--------------------------|--------------|--------------|--------------|--------------------------|-----------------------|------------------------------|--------------------------------------|------------------------------------------|
|                          | water bodies    | wetlands     | Settlements  | other unproductive lands | croplands    | grasslands   | shrubland    | forests                  |                       |                              |                                      |                                          |
| Water bodies             | <b>0.025</b>    | 0.001        | 0.000        | 0.001                    | 0            | 0            | 0.000        | 0.000                    | 900                   | 1424.7                       | 0.026                                | 0.025                                    |
| Wetlands                 | 0.000           | <b>0.006</b> | 0.000        | 0.000                    | 0.000        | 0.000        | 0.000        | 0.000                    | 900                   | 400.4                        | 0.007                                | 0.023                                    |
| Settlements              | 0.000           | 0.000        | <b>0.031</b> | 0.001                    | 0.002        | 0.001        | 0.000        | 0.001                    | 898                   | 1941.5                       | 0.036                                | 0.035                                    |
| Other unproductive lands | 0.000           | 0.000        | 0.000        | <b>0.000</b>             | 0.000        | 0.000        | 0.000        | 0.000                    | 898                   | 22.7                         | 0.000                                | 0.003                                    |
| Croplands                | 0               | 0.003        | 0.001        | 0                        | <b>0.556</b> | 0.037        | 0.002        | 0.007                    | 2232                  | 32857.3                      | 0.606                                | 0.580                                    |
| Grasslands               | 0               | 0.009        | 0.002        | 0.001                    | 0.019        | <b>0.105</b> | 0.006        | 0.012                    | 1176                  | 8341.3                       | 0.154                                | 0.148                                    |
| Shrublands               | 0.000           | 0.000        | 0.000        | 0                        | 0.001        | 0.000        | <b>0.001</b> | 0.001                    | 900                   | 156.3                        | 0.003                                | 0.012                                    |
| Forests                  | 0.000           | 0.004        | 0.001        | 0.000                    | 0.003        | 0.004        | 0.002        | <b>0.153<sup>1</sup></b> | 1333                  | 9111.7                       | 0.168                                | 0.174 <sup>2</sup>                       |

<sup>1</sup> The proportion of correctly classified sample units for the map class “forests” ( $\hat{p}_{ij}$ ) was calculated using data from Table 4 and weighted of this class  $W_i = 0,168$  (Table 4) as follows:

$$\hat{p}_{ij} = W_i \cdot \frac{n_{ij}}{n_i} = 0.168 \cdot \frac{1213}{1333} = 0.153, \quad (1)$$

where  $\hat{p}_{ij}$  denotes sample-based estimator of proportion mapped class  $i$  and reference class  $j$ ;  $W_i$  is the proportion of map area of class  $i$ ;  $n_{ij}$  is the number of sample units mapped as class  $i$  that belong to reference class  $j$ ;  $n_i$  is a total number of sample units mapped as class  $i$ .

<sup>2</sup>The adjusted proportion of area of class “forest” ( $\hat{p}_{\cdot k}$ ) was calculated as the sum of the proportions of class “forest” from the reference classification (the sum of the column “forest” of Table S1):

$$\hat{p}_{\cdot k} = \sum_{i=1}^q \hat{p}_{ik} = 0.153 + 0.001 + 0.012 + 0.007 + 0.001 = 0.174, \quad (2)$$

where  $q$  denotes number of classes;  $\hat{p}_{ik}$  represents the proportion of area mapped as class  $k$  (i.e. “forest”)

The estimated forested area ( $\hat{A}_k$ ) was calculated using estimated proportion of area of class “forest” ( $\hat{p}_{\cdot k}$ ) and total map area ( $A$ ):

$$\hat{A}_k = A \cdot \hat{p}_{\cdot k} = 54.256 \cdot 0.174 = 9.441 \text{ million ha.} \quad (3)$$

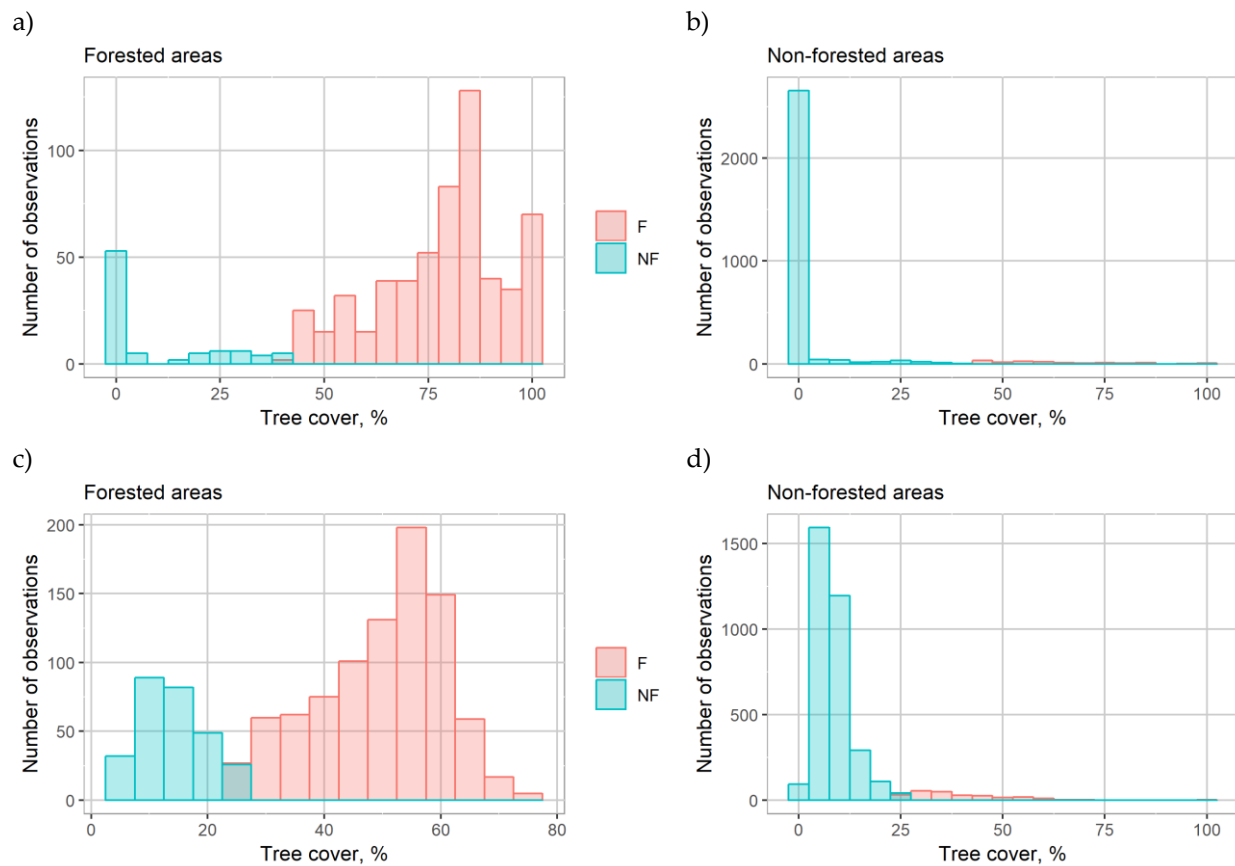

**Figure S4.** Distribution of reference sample units on tree cover values: a) GFC forested areas; b) GFC non-forested areas; c) LTCCF forested areas; d) LTCCF non-forested areas. F represents samples that would be classified as forests, NF – non-forests if a threshold of 40% is applied to GFC and 25% to LTCCF datasets

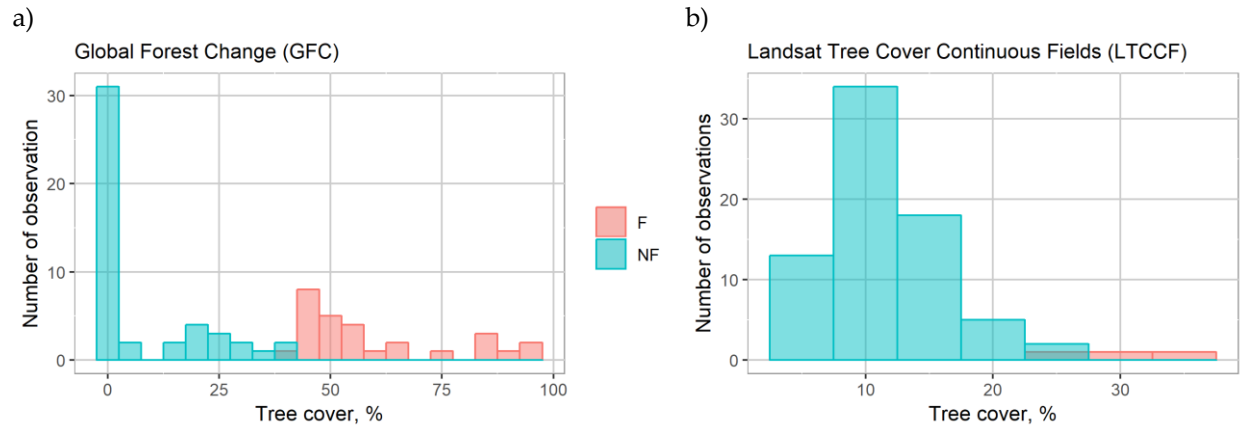

**Figure S5.** Distribution of tree cover values of windbreaks: a) GFC; b) LTCCF. F represents samples that would be classified as forests, NF – non-forests if a threshold of 40% is applied to GFC and 25% to LTCCF datasets

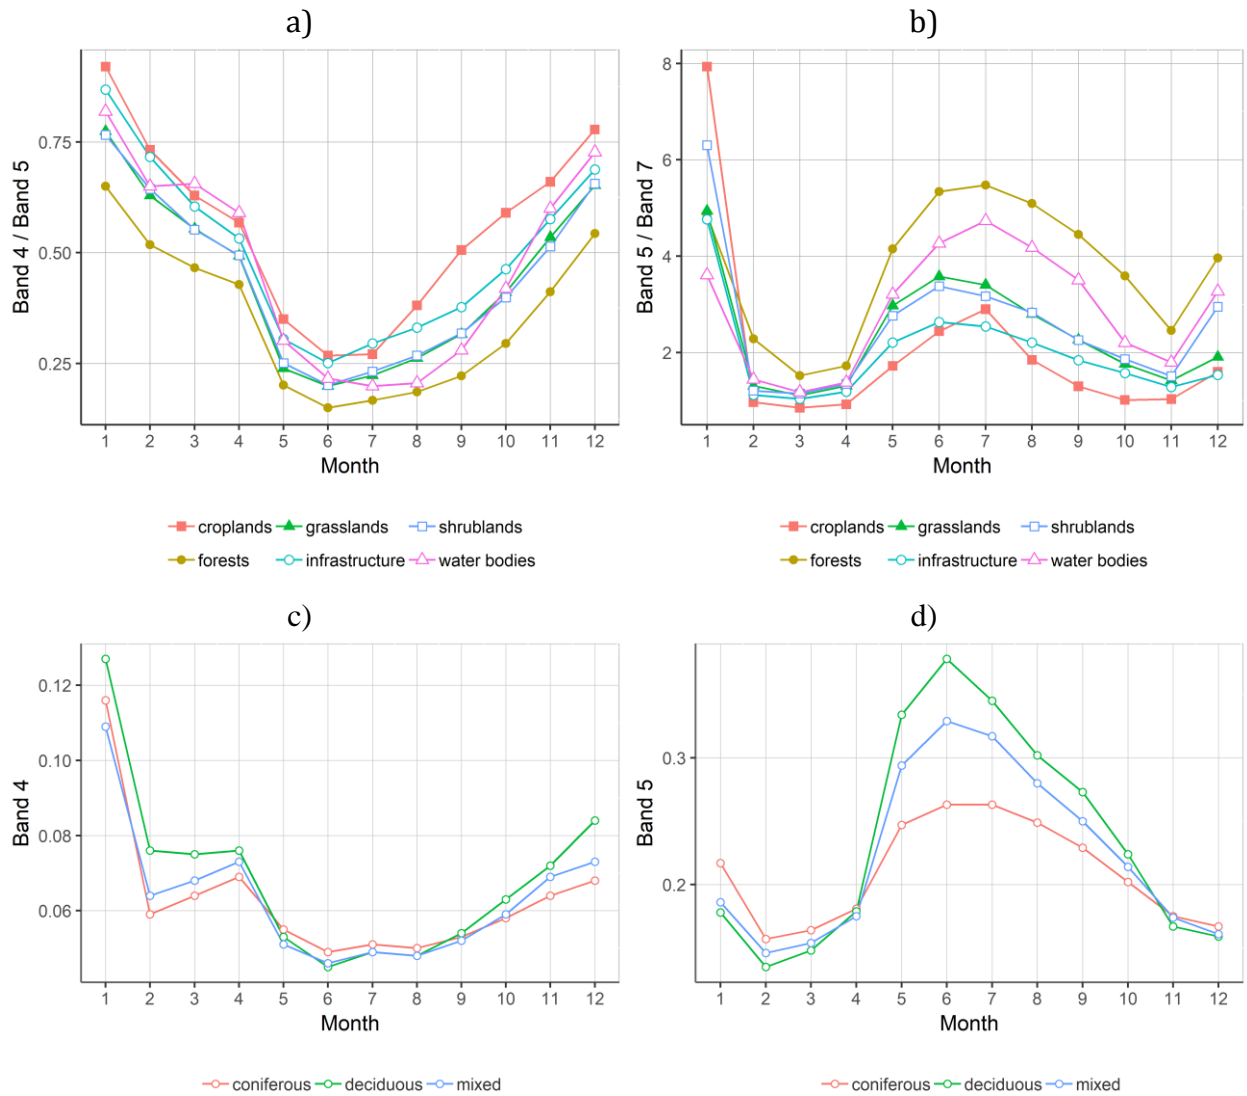

**Figure S6.** Examples of monthly dynamics of spectral features of Landsat 8 OLI time series: a), b) land cover classes; c), d) groups of forest stands
